# Supplementary material
Source: PubMed Central journal article supplement (PMC4842108)
Supplement: NIHMS777011-supplement-10875_2016_266_MOESM1_ESM.pdf [file NIHMS777011-supplement-10875_2016_266_MOESM1_ESM.pdf]

## **Supplementary Material**

**The Journal of Clinical Immunology**

### **Ligase-4 deficiency causes distinctive immune abnormalities in asymptomatic individuals**

Kerstin Felgentreff<sup>1,2</sup>, Sachin N. Baxi<sup>1</sup>, Yu Nee Lee<sup>1</sup>, Kerry Dobbs<sup>1</sup>, Lauren A. Henderson<sup>1</sup>, Krisztian Csomos<sup>3</sup>, Erdyni N. Tsitsikov<sup>4</sup>, Mary Armanios<sup>5</sup>, Jolan E. Walter<sup>1,3\*</sup>, Luigi D. Notarangelo<sup>1,6\*</sup>

\* These authors contributed equally

<sup>1</sup>Division of Immunology, Boston Children's Hospital, Harvard Medical School, Boston, MA, USA

<sup>2</sup>Department of Pediatrics and Adolescent Medicine, Ulm University Medical Center, Ulm, Germany

<sup>3</sup>Pediatric Allergy and Immunology and the Center for Immunology and Inflammatory Diseases, Massachusetts General Hospital, Harvard Medical School, Boston, Massachusetts, USA

<sup>4</sup>Department of Laboratory Medicine, Boston Children's Hospital, Harvard Medical School, Boston, MA, USA

<sup>5</sup>Departments of Oncology, Pathology and McKusick-Nathans Institute of Genetic Medicine, Johns Hopkins University School of Medicine, Baltimore, MD, USA

<sup>6</sup>Harvard Stem Cell Institute, Harvard University, Boston, MA, USA

#### **Corresponding author**

Luigi D. Notarangelo, MD

Division of Immunology, Boston Children's Hospital,

Harvard Stem Cell Institute, Harvard University,

Karp Research Building, Room 10217

1 Blackfan Circle, Boston, MA 02115

Phone: (617)-919-2277, Fax: (617)-730-0709

Email: Luigi.Notarangelo@childrens.harvard.edu

## Supplementary Methods

### Genetic sequencing

Primer sequences for mutations in LIG4:

c.1345A>C: 558bp

F:TTCCAGGTAGAATAGAAATAGTGC

R:CAATTCGTGGAAAACGC

c. 2440C>T 462bp

F: GCCCGTGAATATGATTGC

R: CTGGTTTTCTTCTTGTAATTCACAC

## Supplementary Figures

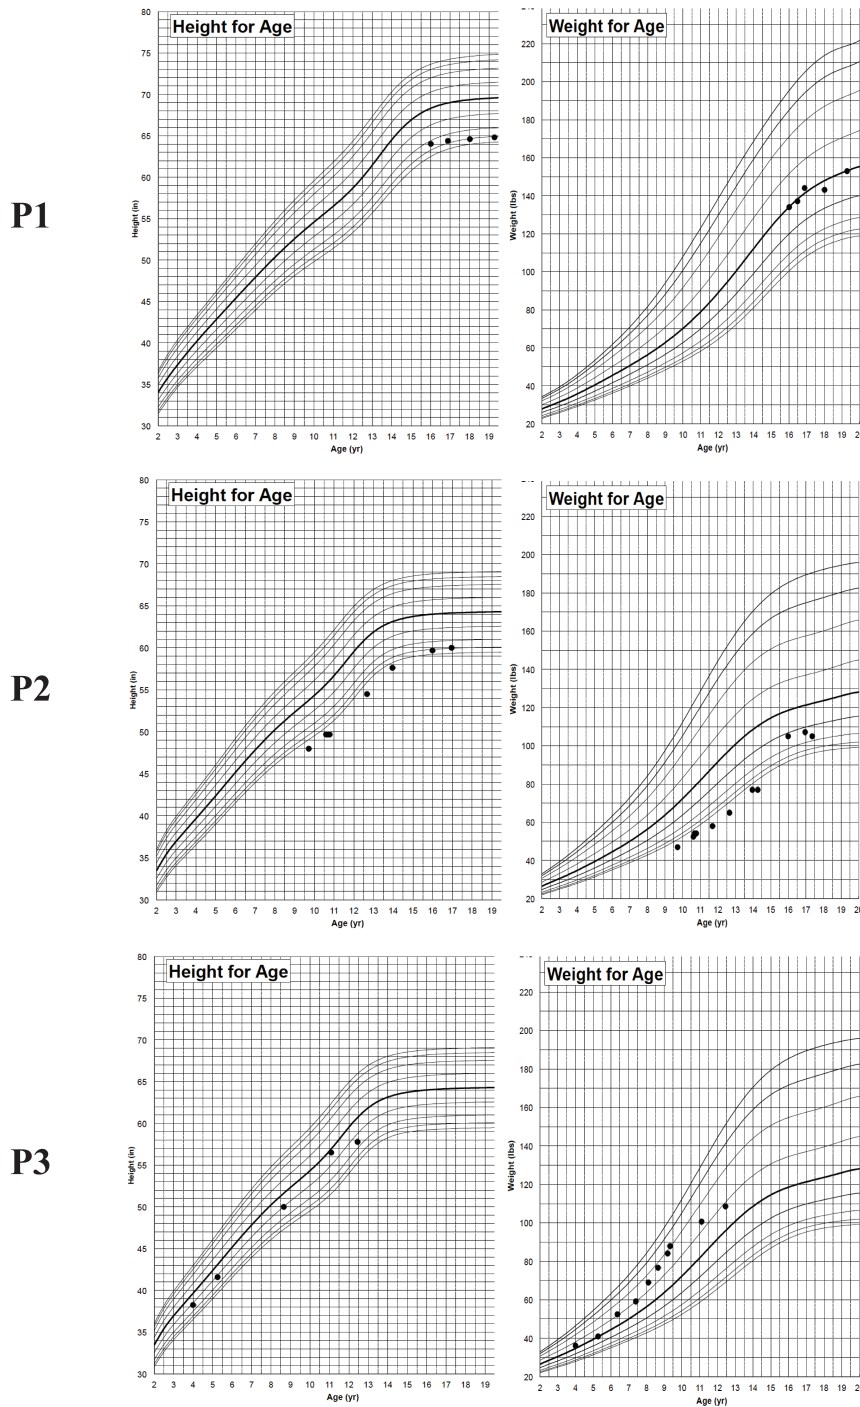

**Fig. S1** Growth charts of P1-P3

The growth charts for height and weight (3<sup>rd</sup>, 5<sup>th</sup>, 10<sup>th</sup>, 25<sup>th</sup>, 50<sup>th</sup>, 75<sup>th</sup>, 90<sup>th</sup>, 95<sup>th</sup>, 97<sup>th</sup> percentiles) were graphed for P1-P3 using the webtool developed by Ernest M. Post, MD and Zimi Medical Technologies, LLC from CDC data on <http://www.cdc.gov/growthcharts>.

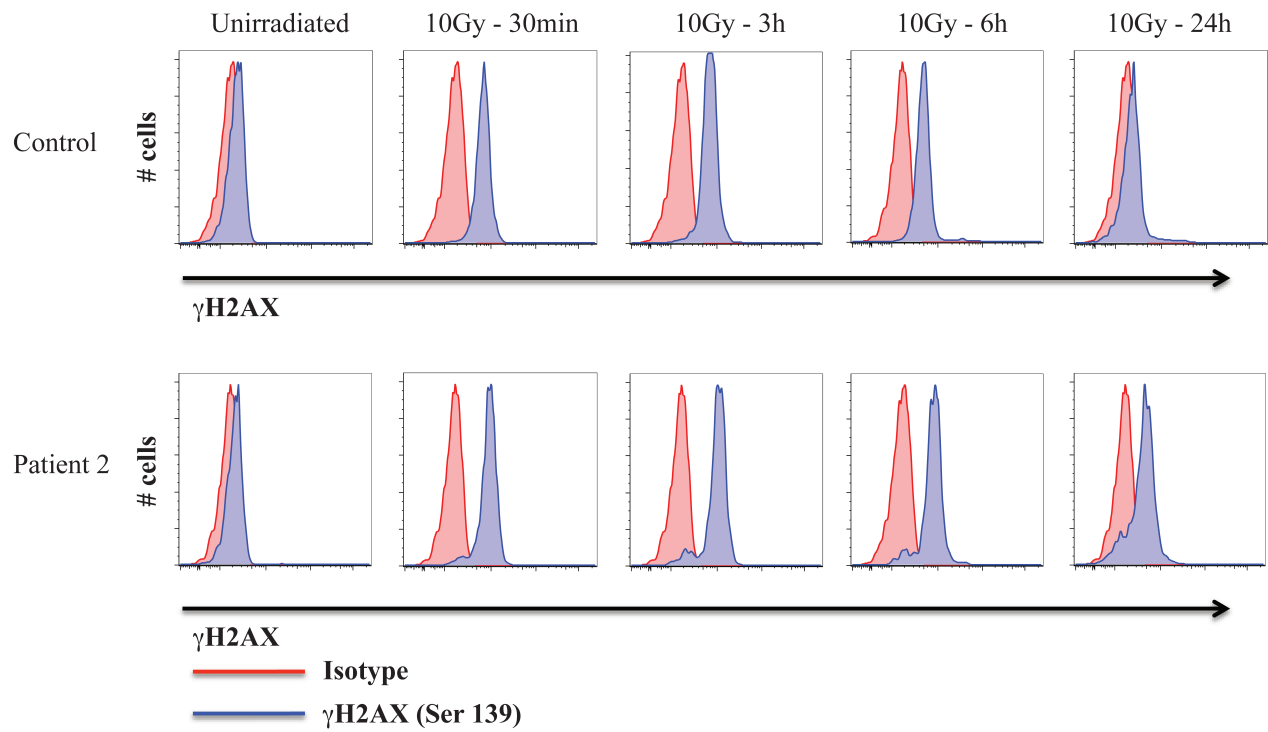

**Fig. S2** Radiosensitivity assessed in PBMCs by  $\gamma$ H2AX staining and flow-cytometry

PBMCs of P2 and a healthy control were irradiated with 10Gy and fixed at given time points. Induction and resolution of phosphorylation of the histone protein H2AX ( $\gamma$ H2AX) at sites of DNA DSB was analyzed by flow-cytometry. Mean fluorescence intensities (MFI) are shown as histograms (blue) compared to isotype (red).



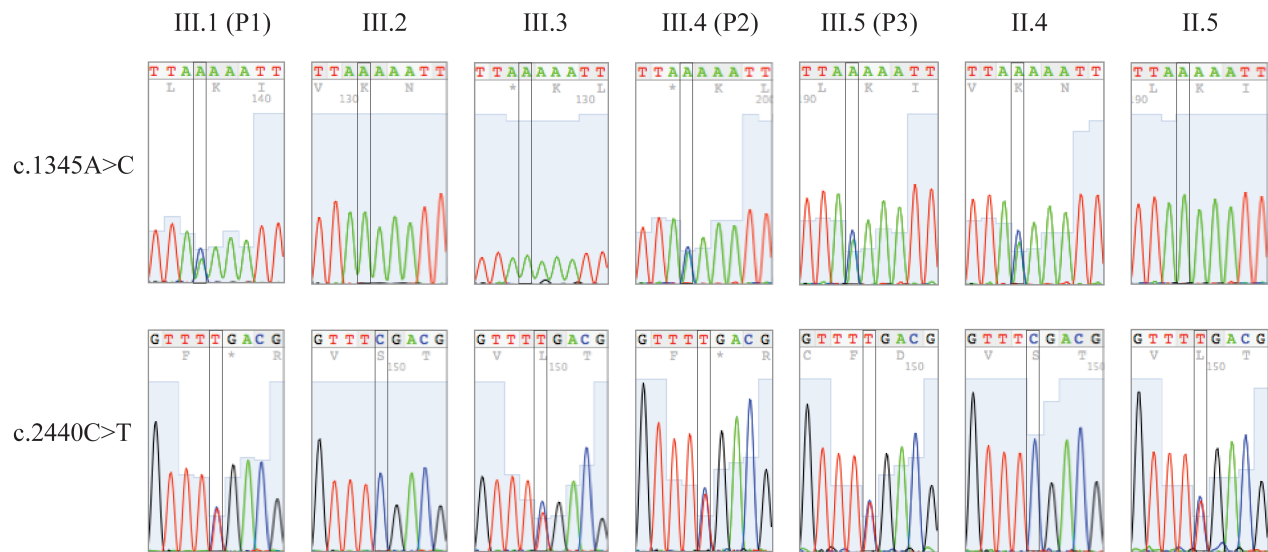

**Fig. S3** Genetic analysis of parents and siblings

Both parents (II.4 and II.5) and their five siblings (III.1-III.5) were analyzed for the two mutations found in the index case III.4 (P2). Sanger sequencing was performed on DNA isolated from peripheral blood cells (PBMCs) and mutated base pairs are indicated in boxes. An older brother, III.1 (P1), and a younger sister, III.5 (P3), were found to be compound heterozygous for both mutations. III.2 has two wild type alleles, and III.3 is a carrier of c.2440C<T.

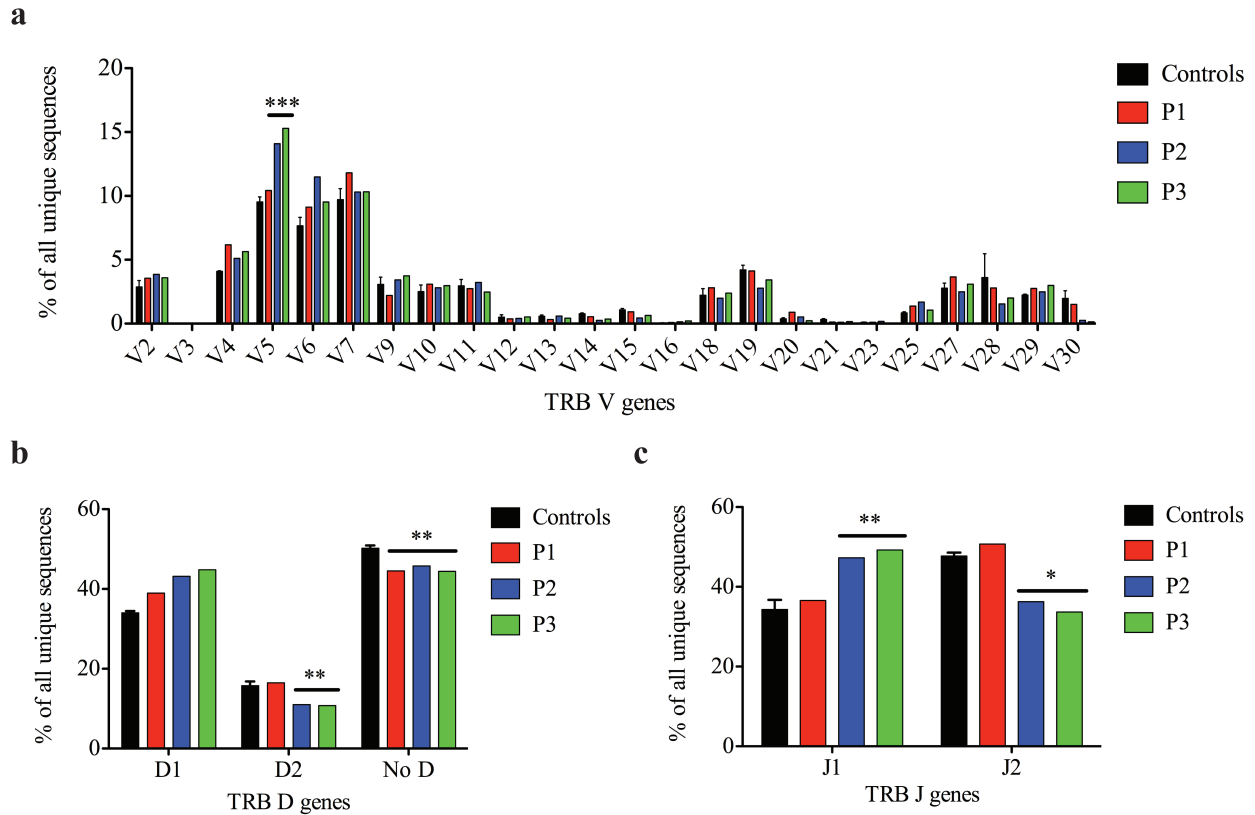

**Fig. S4** V, D and J gene families used in unique *TRB* sequences

Percentages of all used V, D, and J gene families were evaluated in *TRB* repertoires (A-C) of three healthy controls and patients P1-P3 (mean values and standard deviation are shown) (\*  $p \leq 0.05$ , \*\*  $p \leq 0.01$ , \*\*\*  $p \leq 0.001$ ).

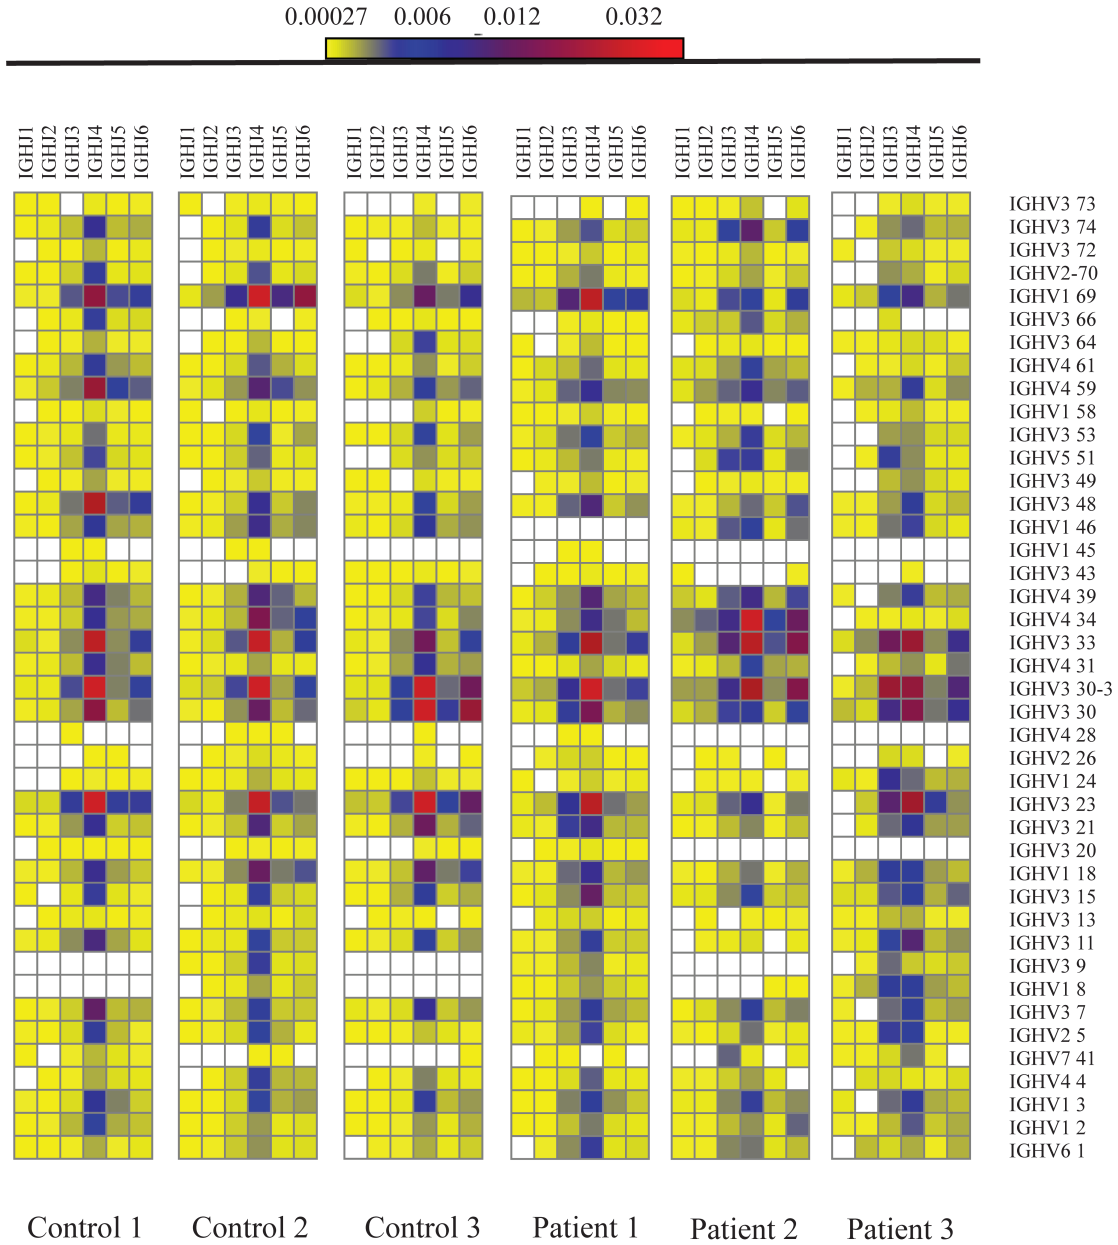

**Fig. S5** Modest skewing in the *IGH* repertoire of *LIG4*-deficient patients P1-P3

Global usage of unique *IGH* sequences is demonstrated for 3 healthy controls and P1-P3 on a heat map showing *IGHV* genes joint with *IGHJ* genes. The frequency of gene usage is color coded, using yellow as very rarely and red as most frequently used; blank spots indicate no usage at all.

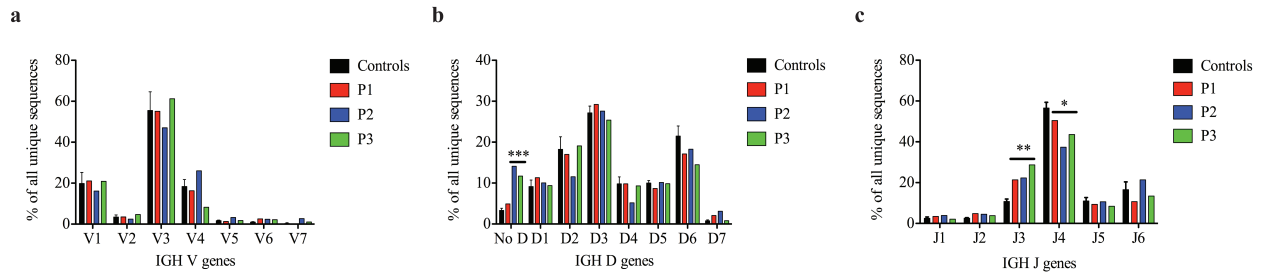

**Fig. S6** V, D and J gene families used in unique *IGH* sequences

Percentages of all used V, D, and J gene families were evaluated in the BCR heavy chain (*IGH*) locus (A-C) of three healthy controls and patients P1-P3 (mean values and standard deviation are shown) (\*  $p \leq 0.05$ , \*\*  $p \leq 0.01$ , \*\*\*  $p \leq 0.001$ ).

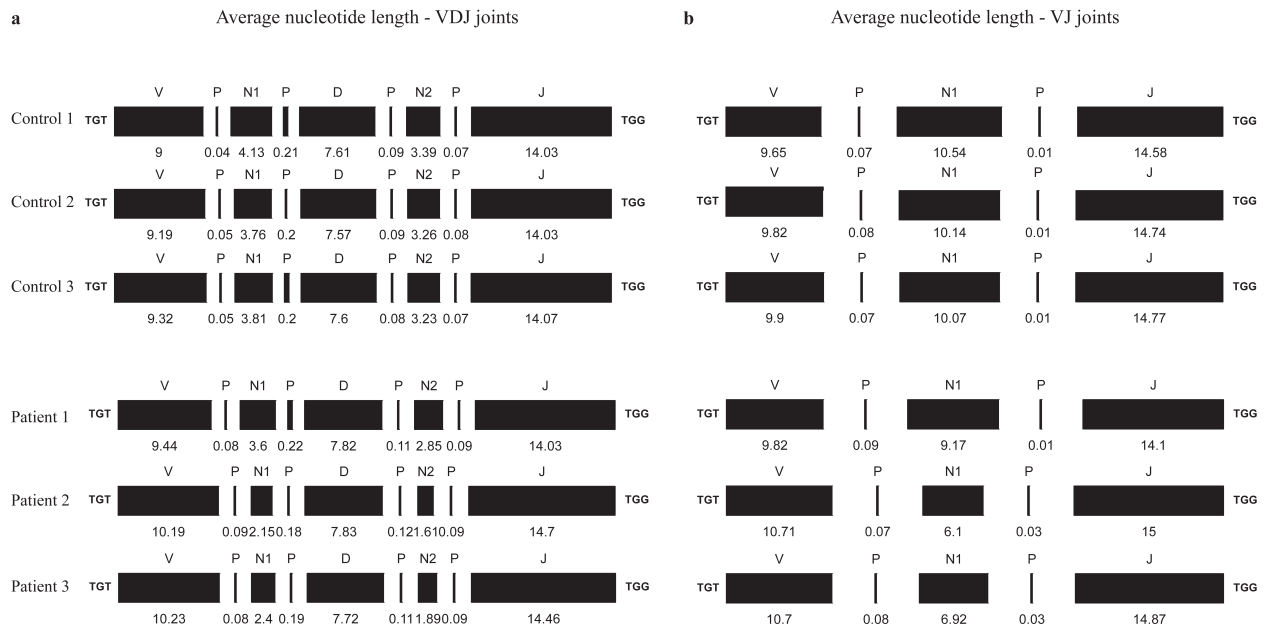

**Fig. S7** Average length of V, D and J elements with P and N nucleotide insertions in *TRB* sequences

Average lengths of V, D and J (A), and V and J gene elements (B) with average length of interspaced P and N nucleotides are shown for *TRB* sequences. N1 nucleotides are added between V and D or V and J gene elements, N2 nucleotides between D and J elements. P nucleotides are located before and after N nucleotides, or directly between joint elements, in case no N nucleotides are added.

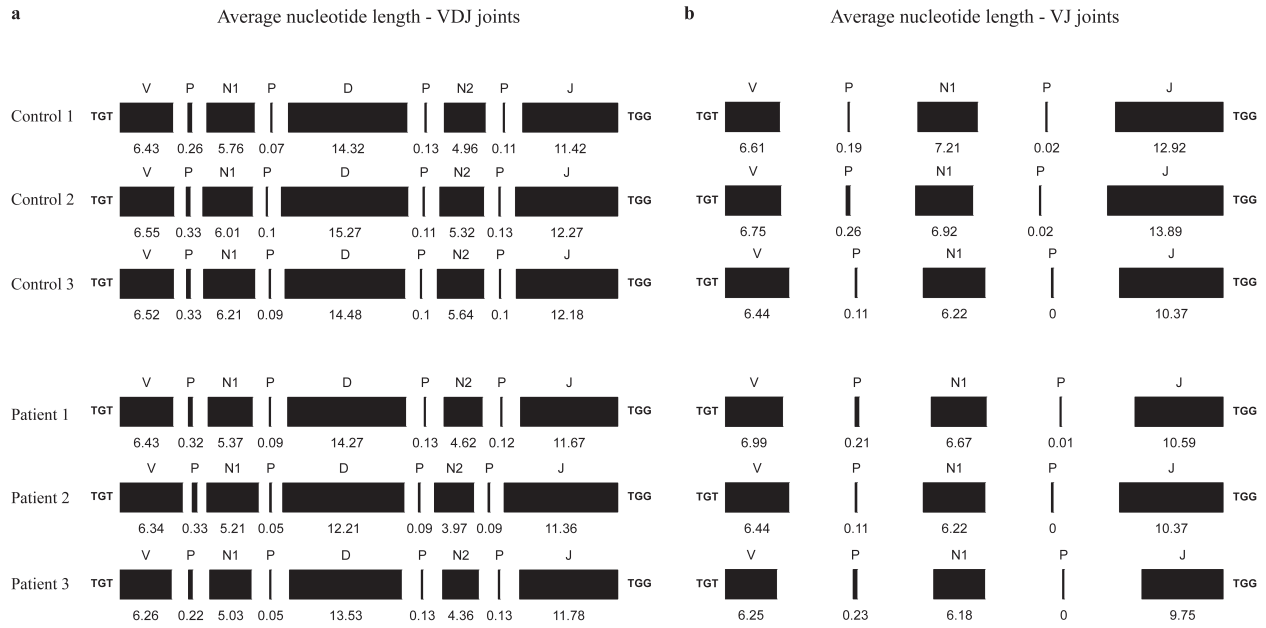

**Fig. S8** Average length of V, D and J elements with P and N nucleotide insertions in *IGH* sequences

Average lengths of V, D and J (A), and V and J gene elements (B) with average length of interspaced P and N nucleotides are shown for *IGH* sequences.

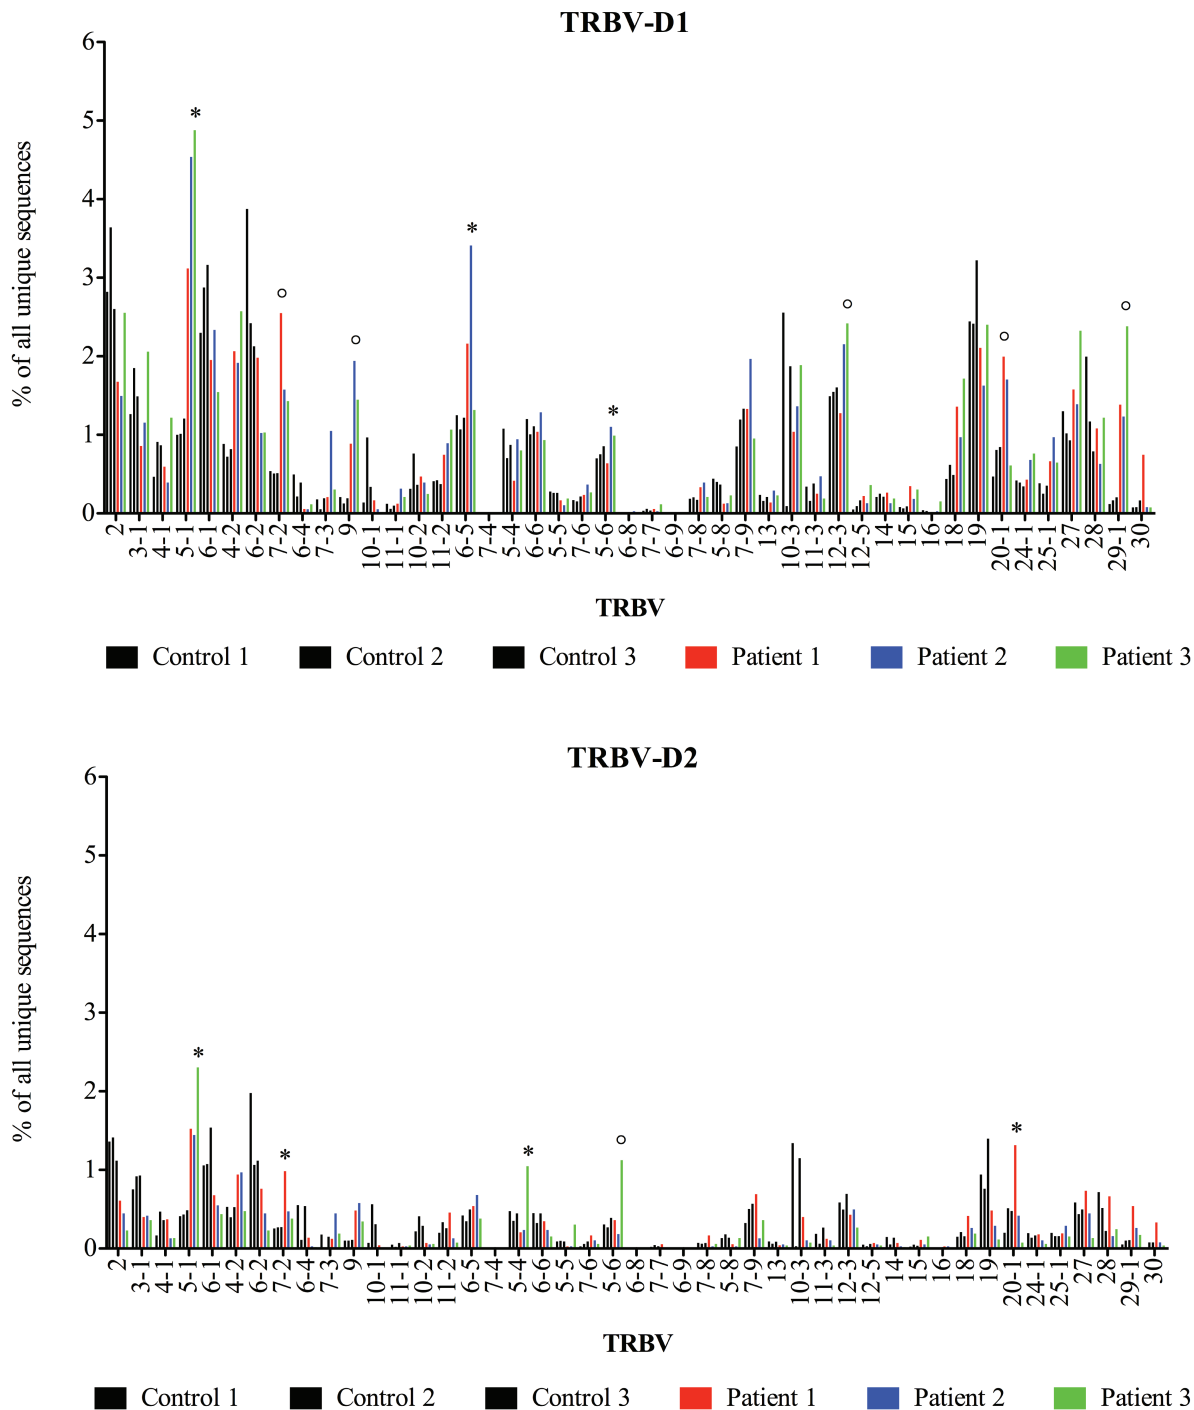

**Fig. S9** Frequency of joins between *TRBV* and *TRBD* genes

The frequencies of all possible joins between *TRBV* and *TRBD1* or *TRBD2*, respectively, are shown as percentage of all unique sequences for 3 healthy controls and patients P1-P3. Joins in which MHMEJ has been found (\*) or in which MHMEJ has been excluded (°) are indicated accordingly.
